# Supplementary material for: Adaptive Hybrid Machine Learning Model For Forecasting The Step-Like Displacements of Reservoir Colluvial Landslides: A Case Study in The Three Gorges Reservoir Area, China
Source: Research Square preprint supplement (doi:10.21203/rs.3.rs-217782/v1), 2021-02-24
Supplement: Supplementary file 1 [file 0b969e29d5eab90b7be5b582.docx]

**Table** 1 Candidate triggering factors and their decomposition parameters

| Candidate triggering  factors | Decomposition parameter | | Decomposition  or not | Reordered number of adaptively decomposed factors |
| --- | --- | --- | --- | --- |
|  |  |
|  | 1 | - | No |  |
|  | 1 | - | No |  |
|  | 5 | 513.7014 | Yes | 、、、、 |
|  | 4 | 439.1801 | Yes | 、、、 |
|  | 4 | 553.0224 | Yes | 、、、 |
|  | 4 | 518.4594 | Yes | 、、、 |
|  | 1 | - | No |  |
|  | 1 | - | No |  |
|  | 2 | 1054.4428 | Yes | 、 |
|  | 1 | - | No |  |
|  | 4 | 80.5204 | Yes | 、、、 |
|  | 1 | - | No |  |
|  | 1 | - | No |  |
|  | 5 | 1.1915 | Yes | 、、、、 |
|  | 1 | - | No |  |
|  | 4 | 12.9752 | Yes | 、、、 |
|  | 3 | 1.2945 | Yes | 、、 |
|  | 3 | 1.3186 | Yes | 、、 |
|  | 3 | 1.2945 | Yes | 、、 |
|  | 1 | - | No |  |
|  | 1 | - | No |  |
|  | 1 | - | No |  |

Note: When , the candidate triggering factor is not decomposed based on the OVMD method.

**Table 2** Performance comparison of the prediction models for the cumulative displacements

| Monitoring site | Model | Evaluation index | | | | | | | | Total number of  input factors |
| --- | --- | --- | --- | --- | --- | --- | --- | --- | --- | --- |
| *RMSE* | | *R2* | | *MAPE* | | *AIC* | |
| Training set | Testing set | Training set | Testing set | Training set | Testing set | Training set | Testing set |
| ZG93 | ① | 17.4751 | 16.3650 | 0.9993 | 0.9954 | 3.25E-06 | 6.4971E-05 | 64.7607 | 64.6049 | 29.52 |
| ② | 38.6489 | 40.2726 | 0.9965 | 0.9784 | 1.30E-05 | 2.7789E-04 | 139.3090 | 139.3913 | 66 |
| (-0.5804) | (-0.6554) | (-7.68E-05) | (-4.66E-04) | (-2.68E-07) | (-5.84E-06) | (-2.0435) | (-2.0501) |
| ③ | 39.2250 | 27.9394 | 0.9964 | 0.9816 | 3.85E-06 | 3.7987E-05 | 83.3385 | 82.6601 | 38 |
| (-2.5648) | (-1.3649) | (-3.42E-04) | (-1.63E-03) | (-7.02E-08) | (+3.18E-06) | (-2.1908) | (-2.1292) |
| ④ | 14.5159 | 34.3427 | 0.9995 | 0.9879 | 1.25E-06 | 2.3064E-04 | 317.3505 | 319.0728 | 156 |
| (+0.0190) | (-0.1152) | (+1.28E-06) | (-4.81E-05) | (+1.28E-08) | (-1.06E-06) | (-1.6192) | (-1.6312) |
| ⑤ | 16.0672 | 34.0923 | 0.9994 | 0.9872 | 1.76E-06 | 2.4165E-04 | 251.5536 | 253.0581 | 123 |
| (+0.0151) | (-0.1896) | (+1.07E-06) | (-8.77E-05) | (+1.59E-08) | (-1.89E-06) | (-1.9982) | (-2.0160) |
| ZG118 | ① | 16.6814 | 23.1888 | 0.9993 | 0.9974 | 5.94E-06 | 1.7911E-04 | 52.1402 | 52.6742 | 23.26 |
| ② | 33.8939 | 32.2191 | 0.9971 | 0.9835 | 7.54E-06 | 2.0235E-04 | 139.0465 | 138.9451 | 66 |
| (-0.4027) | (-0.2113) | (-5.15E-05) | (-3.25E-04) | (-3.73E-08) | (-5.44E-07) | (-2.0334) | (-2.0185) |
| ③ | 36.6687 | 24.9150 | 0.9966 | 0.986 | 5.01E-06 | 7.9450E-05 | 85.2038 | 84.4309 | 39 |
| (-1.2698) | (-0.1097) | (-1.72E-04) | (-7.24E-04) | (+5.93E-08) | (+6.33E-06) | (-2.1006) | (-2.0176) |
| ④ | 13.7103 | 46.0783 | 0.9995 | 0.9862 | 6.81E-07 | 3.4136E-04 | 317.236 | 319.6607 | 156 |
| (+0.0224) | (-0.1724) | (+1.51E-06) | (-8.44E-05) | (+3.96E-08) | (-1.22E-06) | (-1.9971) | (-2.0113) |
| ⑤ | 14.8868 | 23.7909 | 0.9994 | 0.9911 | 9.85E-07 | 1.0860E-04 | 263.4010 | 264.3386 | 129 |
| (+0.0170) | (-0.0057) | (+9.46E-07) | (-5.96E-05) | (+4.69E-08) | (+6.67E-07) | (-1.9979) | (-2.0017) |
| XD01 | ① | 25.6475 | 23.6041 | 0.9993 | 0.9965 | 2.41E-06 | 8.4140E-05 | 59.2778 | 59.0712 | 26.4 |
| ② | 49.0062 | 58.4528 | 0.9976 | 0.9806 | 1.39E-05 | 2.7140E-04 | 139.7839 | 140.1364 | 66 |
| (-0.5899) | (-0.8800) | (-4.29E-05) | (-4.02E-04) | (-2.91E-07) | (-4.73E-06) | (-2.0330) | (-2.0471) |
| ③ | 40.3796 | 57.8299 | 0.9967 | 0.9874 | 1.59E-05 | 1.1883E-04 | 86.1150 | 85.3967 | 39 |
| (-1.1692) | (-2.7163) | (-2.06E-04) | (-7.22E-04) | (-1.07E-06) | (-2.75E-06) | (-2.1299) | (-2.0893) |
| ④ | 14.4541 | 35.0616 | 0.9998 | 0.9920 | 7.55E-08 | 4.2518E-05 | 317.3420 | 319.1142 | 156 |
| (+0.0864) | (-0.0884) | (+3.86E-06) | (-3.47E-05) | (+1.80E-08) | (+3.21E-07) | (-1.9912) | (-2.0065) |
| ⑤ | 20.6926 | 30.0310 | 0.9996 | 0.9919 | 6.87E-07 | 1.1932E-05 | 266.0595 | 266.8045 | 130 |
| (+0.0478) | (-0.0620) | (+2.90E-06) | (-4.44E-05) | (+1.66E-08) | (+6.97E-07) | (-1.9960) | (-2.0051) |

Notes: ① denotes the proposed OVMD-GWO-KELM model based on optimized factors; ② denotes the VMD-GWO-KELM model based on candidate factors; ③ denotes the VMD-GWO-KELM model based on candidate factors that are optimized by the GRA method; ④ denotes the VMD-GWO-KELM model based on adaptively decomposed candidate factors; ⑤ denotes the VMD-GWO-KELM model based on adaptively decomposed candidate factors that are optimized by the GRA method. Taking the proposed model as the comparison target, the positive or negative values in brackets represent the improvement or decrease in the model performance indexes with each addition of an input factor, respectively.
